# Supplementary material
Source: publisher figshare collection journal article supplement (https://acs.figshare.com/ndownloader/files/7725592)
Supplement: Supplementary file 1 [file 7725592]

## Supporting Information

### Hierarchical Structural Evolution of $\text{Zn}_2\text{GeO}_4$ in Binary Solvent and its Effect on Li-ion Storage Performance

Wei Liu,<sup>†</sup> Tengfei Zhou,<sup>‡</sup> Yang Zheng,<sup>‡</sup> Jianwen Liu,<sup>†</sup> Chuanqi Feng,<sup>†</sup> Yue Shen,<sup>§</sup> Yunhui Huang,<sup>§</sup> and Zaiping Guo,<sup>\*,†,‡</sup>

<sup>†</sup>Hubei Collaborative Innovation Center for Advanced Organic Chemical Materials, Ministry-of-Education Key Laboratory for Synthesis and Applications of Organic Functional Molecules, Hubei University, Wuhan 430062, China.

<sup>‡</sup>Institute for Superconducting and Electronic Materials, School of Mechanical, Materials, and Mechatronics Engineering, University of Wollongong, North Wollongong, NSW 2500, Australia.

<sup>§</sup>State Key Laboratory of Material Processing and Die & Mould Technology, School of Materials Science and Engineering, Huazhong University of Science and Technology, Wuhan, Hubei 430074, China.

\*Correspondence to: [zguo@uow.edu.au](mailto:zguo@uow.edu.au) (ZPG)

**Materials Characterization.** The crystalline phases of the resultant materials were characterized by powder X-ray diffraction (XRD, PANalytical B.V.), which was carried out using Cu K $\alpha$  radiation ( $\lambda = 1.5406 \text{ \AA}$ ) from  $2\theta = 10^\circ$  to  $80^\circ$ . The morphology and microstructure were observed with a field emission scanning electron microscope (FE-SEM, Nova NanoSEM 450) and a field emission transmission electron microscopy (FE-TEM; Tecnai G2 F30). Raman spectroscopy was collected on an inVia Reflex (Renishaw) spectrometer using a 785 nm laser. X-ray photoelectron spectra (XPS) were recorded on a VG MultiLab 2000 system with a monochromatic Al K $\alpha$  X-ray source (ThermoVG Scientific).

**Electrochemical Measurements.** The electrodes were fabricated by mixing the active material, Super P, and Na-carboxymethyl cellulose (CMC) in a weight ratio of 8:1:1 in deionized water, followed by pasting the slurry onto copper foil by scraping with a knife. After drying in vacuum at  $80^\circ\text{C}$  for 24 h, it was cut into small pieces with a diameter of 8 mm. The 2032 cells were assembled in an argon filled glovebox, using lithium metal as the counter electrode, Celgard 2300 membrane as the separator, and 1 M LiPF<sub>6</sub> dissolved in ethylene carbonate, diethyl carbonate and dimethyl carbonate (EC-DEC-DMC) mixed solvent (1:1:1 by weight) as the electrolyte. The electrochemical performances were recorded on a Land battery measurement system (Wuhan, China) with a cut-off voltage of 0.01–2.80 V vs. Li/Li<sup>+</sup> at room temperature. Cyclic voltammetry (CV) curves were recorded on an electrochemical workstation (CHI 660d) at a scan rate of  $0.1 \text{ mV s}^{-1}$  between 0.01 and 2.80 V.

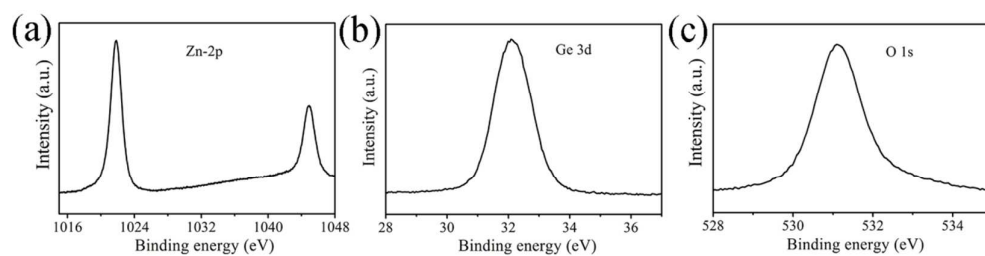

**Figure S1.** XPS spectra of ZGO-2: a) Zn 2p peak, b) Ge 3d peak, and c) O 1s peak.

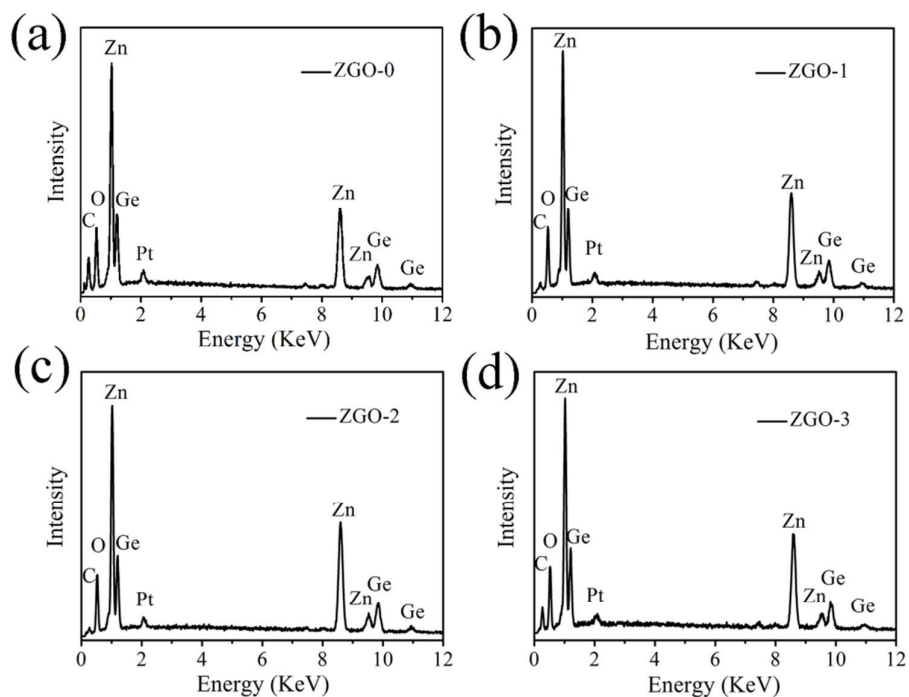

**Figure S2.** EDS spectra of ZGO-0 (a), ZGO-1 (b), ZGO-2 (c), and ZGO-3 (d), respectively. The microanalyses confirmed the presence of Zn, Ge, and O species, as well as signals of C and Pt, which were generated from the carbon conductive tape and by Pt sputtering to decrease the charging effects under the SEM-imaging conditions.

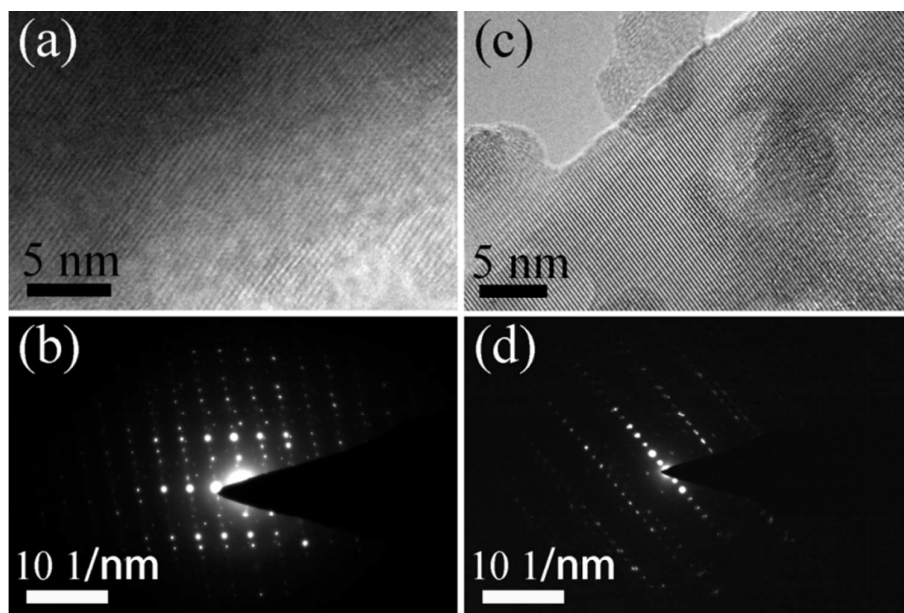

**Figure S3.** HRTEM images and corresponding FFT patterns of ZGO-0 (a, b) and ZGO-2 (c, d), respectively.

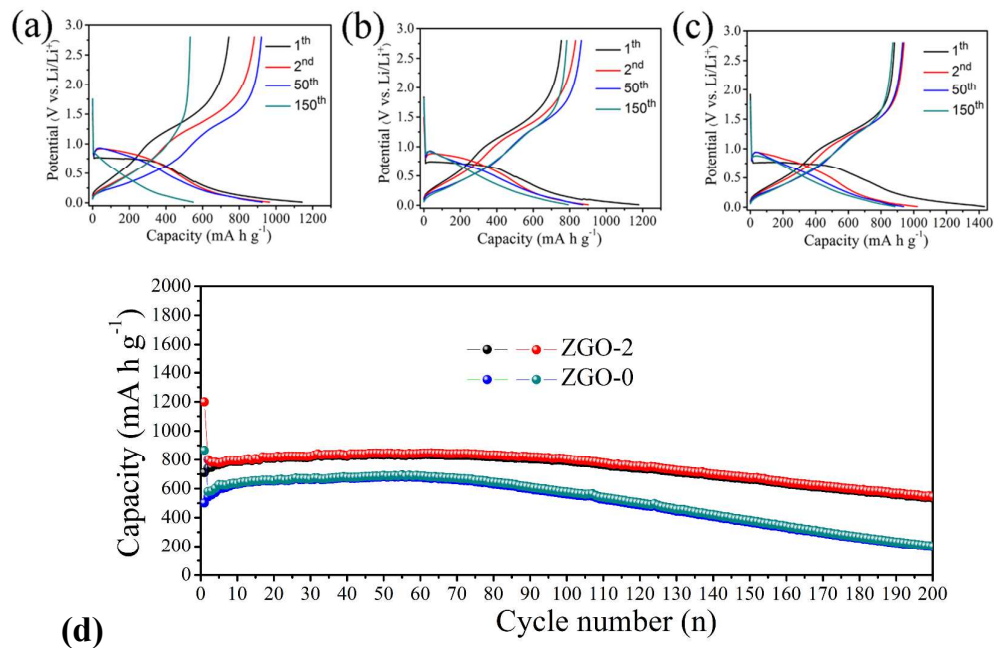

**Figure S4.** Discharge and charge profiles of ZGO-0 (a), ZGO-1 (b), and ZGO-3 (c) at a current density of  $0.5 \text{ A g}^{-1}$  for the 1<sup>st</sup>, 2<sup>nd</sup>, 50<sup>th</sup>, and 150<sup>th</sup> cycles, (d) Cycling performances of ZGO-0 and ZGO-2 at the charge/discharge current density of  $1 \text{ A g}^{-1}$  between 0.01 and 2.80 V.

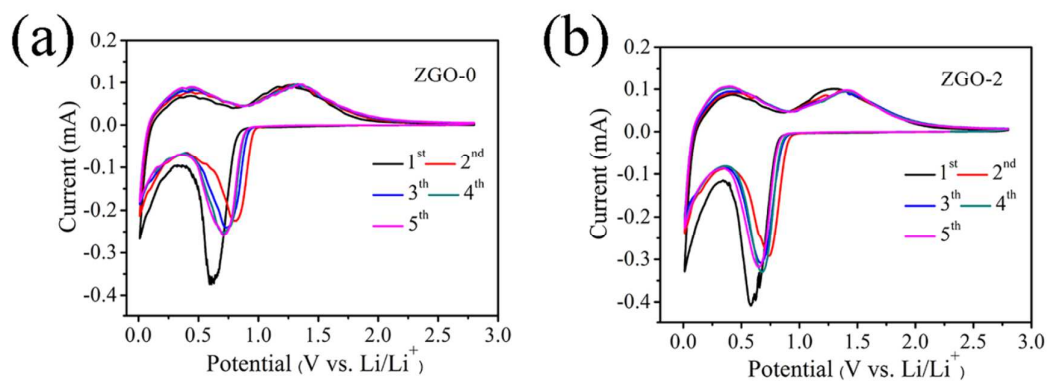

**Figure S5.** Cyclic voltammograms for the first 5 cycles of ZGO-0 (a), and ZGO-2 (b).

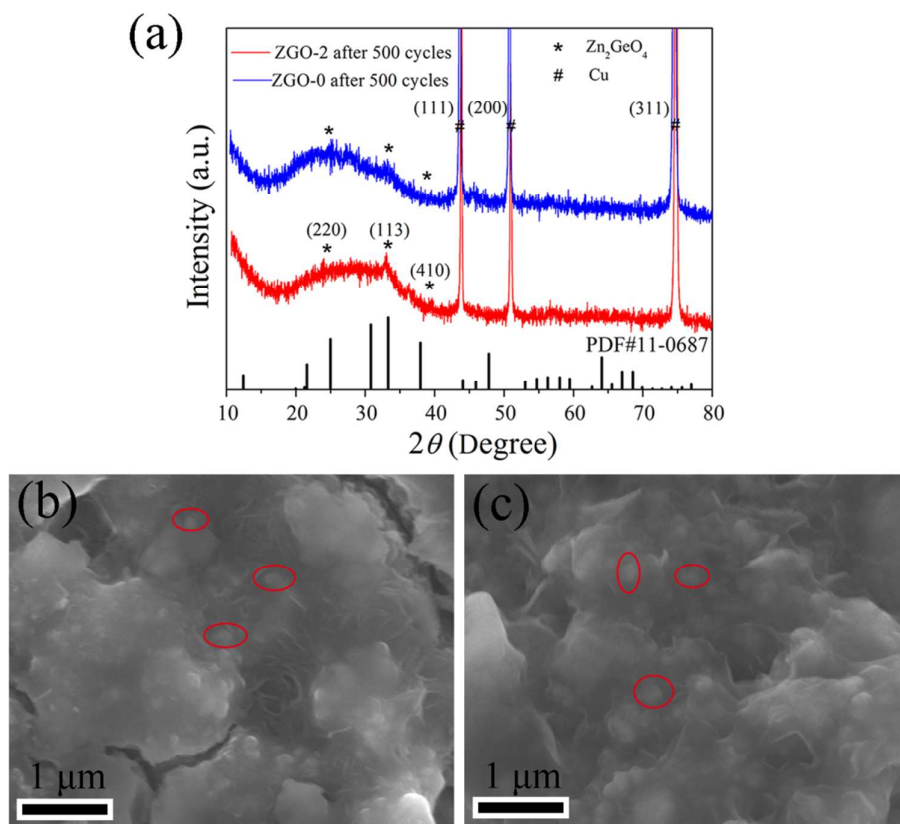

**Figure S6.** (a) X-ray diffraction patterns of the cycled ZGO-0 and ZGO-2 electrodes, and the cycled SEM images of ZGO-0 (b) and ZGO-2 (c) electrode.



**Table S1.** Comparison of the capacity of present work with reported Zn<sub>2</sub>GeO<sub>4</sub>-based materials.

| Sample                                                                    | Current density<br>(A g <sup>-1</sup> ) | Cycle number<br>(n) | Capacity<br>(mA h g <sup>-1</sup> ) | Ref             |
|---------------------------------------------------------------------------|-----------------------------------------|---------------------|-------------------------------------|-----------------|
| Zn <sub>2</sub> GeO <sub>4</sub> nanorods                                 | 0.4                                     | 100                 | 616                                 | [1]             |
| Zn <sub>2</sub> GeO <sub>4</sub> /N-doped<br>graphene                     | 0.1                                     | 100                 | 1044                                | [2]             |
| Zn <sub>2</sub> GeO <sub>4</sub> hollow<br>nanoparticles                  | 0.2                                     | 60                  | 1175                                | [3]             |
| Amorphous Zn <sub>2</sub> GeO <sub>4</sub><br>nanoparticles               | 0.4                                     | 500                 | 1250                                | [4]             |
| Zn <sub>2</sub> GeO <sub>4</sub> /g-C <sub>3</sub> N <sub>4</sub> hybrids | 0.2                                     | 140                 | 1370                                | [5]             |
| Coaxial Zn <sub>2</sub> GeO <sub>4</sub> @<br>carbon nanowires            | 0.2                                     | 100                 | 1112                                | [6]             |
| Sandwiched<br>Zn <sub>2</sub> GeO <sub>4</sub> -graphene oxide            | 0.2                                     | 100                 | 1150                                | [7]             |
| Mn-doped Zn <sub>2</sub> GeO <sub>4</sub><br>nanosheets                   | 0.1                                     | 100                 | 1301                                | [8]             |
| Interlaced porous<br>Zn <sub>2</sub> GeO <sub>4</sub> nanofibe            | 0.2                                     | 50                  | 1084                                | [9]             |
| Fascicular Zn <sub>2</sub> GeO <sub>4</sub>                               | 0.5                                     | 160                 | 1034                                | In this<br>work |

## Reference

- (1) Feng, J. K.; Lai, M. O.; Lu, L. Zn<sub>2</sub>GeO<sub>4</sub> Nanorods Synthesized by Low-temperature Hydrothermal Growth for High-capacity Anode of Lithium Battery. *Electrochem. Commun.* **2011**, *13*, 287–289.
- (2) Zou, F.; Hu, X.; Sun, Y.; Luo, W.; Xia, F.; Qie, L.; Jiang, Y.; Huang, Y. Microwave-induced In Situ Synthesis of Zn<sub>2</sub>GeO<sub>4</sub>/N-Doped Graphene Nanocomposites and Their Lithium-storage Properties. *Chem. Eur. J.* **2013**, *19* (19), 6027-6033.
- (3) Feng, Y.; Li, X.; Shao, Z.; Wang, H. Morphology-dependent Performance of Zn<sub>2</sub>GeO<sub>4</sub> as a High-Performance Anode Material for Rechargeable Lithium Ion Batteries. *J. Mater. Chem. A* **2015**, *3*(29), 15274-15279.
- (4) Yi, R.; Feng, J. K.; Lv, D.; Gordin, M.; Chen, S.; Choi, D.; Wang, D. Amorphous Zn<sub>2</sub>GeO<sub>4</sub> Nanoparticles as Anodes with High Reversible Capacity and Long Cycling Life for Li-ion Batteries. *Nano Energy* **2013**, *2*(4), 498-504.
- (5) Li, X.; Feng, Y.; Li, M.; Li, W.; Wei, H.; Song, D. Smart Hybrids of Zn<sub>2</sub>GeO<sub>4</sub> Nanoparticles and Ultrathin g-C<sub>3</sub>N<sub>4</sub> Layers: Synergistic Lithium Storage and Excellent Electrochemical Performance. *Adv. Funct. Mater.* **2015**, *25*, 6858–6866.
- (6) Chen, W.; Lu, L.; Maloney, S.; Yang, Y.; Wang, W. Coaxial Zn<sub>2</sub>GeO<sub>4</sub>@Carbon Nanowires Directly Grown on Cu Foils as High-performance Anodes for Lithium Ion Batteries. *Phys. Chem. Chem. Phys.* **2015**, *17*, 5109-5114
- (7) Zou, F.; Hu, X.; Qie, L.; Jiang, Y.; Xiong, X.; Qiao, Y.; Huang, Y. Facile Synthesis of Sandwiched Zn<sub>2</sub>GeO<sub>4</sub>-graphene Oxide Nanocomposite as a Stable and High-capacity Anode for Lithium-ion Batteries. *Nanoscale* **2014**, *6*(2), 924-930.

- (8) Li, Q.; Miao, X.; Wang, C.; Yin, L. Three-dimensional Mn-doped  $\text{Zn}_2\text{GeO}_4$  Nanosheet Array Hierarchical Nanostructures Anchored on Porous Ni Foam as Binder-free and Carbon-free Lithium-ion Battery Anodes with Enhanced Electrochemical Performance. *J. Mater. Chem. A* **2015**, 3(42), 21328-21336.
- (9) Wang, W.; Qin, J.; Cao, M. Structure Interlacing and Pore Engineering of  $\text{Zn}_2\text{GeO}_4$  Nanofibers for Achieving High Capacity and Rate Capability as an Anode Material of Lithium Ion Batteries. *ACS Appl. Mater. Interfaces* **2016**, 8, 1388–1397.
